# Supplementary material for: Developing and validating a scoring system for measuring frailty in patients with hip fracture: a novel model for predicting short-term postoperative mortality
Source: HighWire-hosted journal article supplement (doi:10.1136/tsaco-2022-000962), 2022-09-01
Supplement: tsaco-2022-000962supp001_data_supplement.pdf [file tsaco-2022-000962supp001_data_supplement.pdf]

| <b>Supplemental Table 1. Comparison of national and local datasets</b> |                                           |                                      |            |
|------------------------------------------------------------------------|-------------------------------------------|--------------------------------------|------------|
|                                                                        | <b>National dataset<br/>(N = 126,065)</b> | <b>Local dataset<br/>(N = 2,365)</b> | <b>ASD</b> |
| OFS, n (%)                                                             |                                           |                                      | 0.135      |
| 0                                                                      | 30,135 (23.9)                             | 618 (26.1)                           |            |
| 1                                                                      | 34,942 (27.7)                             | 636 (26.9)                           |            |
| 2                                                                      | 33,467 (26.5)                             | 547 (23.1)                           |            |
| 3                                                                      | 21,686 (17.2)                             | 399 (16.9)                           |            |
| 4                                                                      | 5,396 (4.3)                               | 144 (6.1)                            |            |
| 5                                                                      | 439 (0.3)                                 | 21 (0.9)                             |            |
| Frail (OFS $\geq 2$ ), n (%)                                           | 60,988 (48.4)                             | 1,111 (47.0)                         | 0.028      |
| Age, median [IQR]                                                      | 84 [77.0-89.0]                            | 84 [76.3-89.0]                       | 0.018      |
| Sex, n (%)                                                             |                                           |                                      | 0.015      |
| Female                                                                 | 85,746 (68.0)                             | 1,601 (67.7)                         |            |
| Male                                                                   | 40,308 (32.0)                             | 764 (32.3)                           |            |
| Missing                                                                | 11 (0.0)                                  | 0 (0.0)                              |            |
| CCI, n (%)                                                             |                                           |                                      | 0.268      |
| $<5$                                                                   | 56,159 (44.5)                             | 748 (31.6)                           |            |
| $\geq 5$                                                               | 69,906 (55.5)                             | 1,617 (68.4)                         |            |
| Type of fracture, n (%)                                                |                                           |                                      | 0.032      |
| Intracapsular fracture                                                 | 67,966 (53.9)                             | 1,258 (53.2)                         |            |
| Extracapsular fracture                                                 | 58,050 (46.0)                             | 1,107 (46.8)                         |            |
| Missing                                                                | 49 (0.0)                                  | 0 (0.0)                              |            |
| Type of surgery, n (%)                                                 |                                           |                                      | 0.133      |
| Internal fixation                                                      | 84,193 (66.8)                             | 1,721 (72.8)                         |            |
| Arthroplasty                                                           | 41,819 (33.2)                             | 644 (27.2)                           |            |
| Missing                                                                | 53 (0.0)                                  | 0 (0.0)                              |            |
| 30-day mortality, n (%)                                                | 9,240 (7.3)                               | 191 (8.1)                            | 0.028      |
| 90-day mortality, n (%)                                                | 16,295 (12.9)                             | 340 (14.4)                           | 0.042      |

An ASD  $\geq 0.1$  is considered a clinically significant difference.

ASD, absolute standardized difference; OFS, Orthopedic Hip Frailty Score; ASA, American Society of Anesthesiologists; CCI, Charlson Comorbidity Index

| <b>Supplemental Table 2. 30-day mortality distribution for all indices</b> |                              |                           |                |
|----------------------------------------------------------------------------|------------------------------|---------------------------|----------------|
|                                                                            | <b>Alive<br/>(N = 2,174)</b> | <b>Dead<br/>(N = 191)</b> | <b>P-value</b> |
| OFS, n (%)                                                                 |                              |                           | <0.001         |
| 0                                                                          | 616 (99.7)                   | 2 (0.3)                   |                |
| 1                                                                          | 607 (95.4)                   | 29 (4.6)                  |                |
| 2                                                                          | 493 (90.1)                   | 54 (9.9)                  |                |
| 3                                                                          | 340 (85.2)                   | 59 (14.8)                 |                |
| 4                                                                          | 108 (75.0)                   | 36 (25.0)                 |                |
| 5                                                                          | 10 (47.6)                    | 11 (52.4)                 |                |
| NHFS, n (%)                                                                |                              |                           | <0.001         |
| 0                                                                          | 43 (100.0)                   | 0 (0.0)                   |                |
| 1                                                                          | 73 (100.0)                   | 0 (0.0)                   |                |
| 2                                                                          | 22 (91.7)                    | 2 (8.3)                   |                |
| 3                                                                          | 319 (99.1)                   | 3 (0.9)                   |                |
| 4                                                                          | 574 (97.0)                   | 18 (3.0)                  |                |
| 5                                                                          | 544 (92.8)                   | 42 (7.2)                  |                |
| 6                                                                          | 386 (86.9)                   | 58 (13.1)                 |                |
| 7                                                                          | 157 (79.7)                   | 40 (20.3)                 |                |
| 8                                                                          | 47 (71.2)                    | 19 (28.8)                 |                |
| 9                                                                          | 9 (56.2)                     | 7 (43.8)                  |                |
| 10                                                                         | 0 (0.0)                      | 2 (100.0)                 |                |
| Sernbo Score, n (%)                                                        |                              |                           | <0.001         |
| 8                                                                          | 273 (79.4)                   | 71 (20.6)                 |                |
| 11                                                                         | 362 (87.4)                   | 52 (12.6)                 |                |
| 14                                                                         | 596 (93.3)                   | 43 (6.7)                  |                |
| 17                                                                         | 539 (96.3)                   | 21 (3.8)                  |                |
| 20                                                                         | 404 (99.0)                   | 4 (1.0)                   |                |
| CCI, n (%)                                                                 |                              |                           | <0.001         |
| 0                                                                          | 7 (100.0)                    | 0 (0.0)                   |                |
| 1                                                                          | 30 (100.0)                   | 0 (0.0)                   |                |
| 2                                                                          | 95 (100.0)                   | 0 (0.0)                   |                |
| 3                                                                          | 155 (99.4)                   | 1 (0.6)                   |                |
| 4                                                                          | 443 (96.3)                   | 17 (3.7)                  |                |
| 5                                                                          | 430 (92.9)                   | 33 (7.1)                  |                |
| 6                                                                          | 399 (92.1)                   | 34 (7.9)                  |                |
| 7                                                                          | 253 (86.9)                   | 38 (13.1)                 |                |
| 8                                                                          | 128 (82.6)                   | 27 (17.4)                 |                |
| 9                                                                          | 92 (83.6)                    | 18 (16.4)                 |                |
| 10                                                                         | 64 (90.1)                    | 7 (9.9)                   |                |
| 11                                                                         | 41 (85.4)                    | 7 (14.6)                  |                |
| 12                                                                         | 24 (82.8)                    | 5 (17.2)                  |                |
| 13                                                                         | 9 (81.8)                     | 2 (18.2)                  |                |
| 14                                                                         | 2 (66.7)                     | 1 (33.3)                  |                |
| 15                                                                         | 0 (0.0)                      | 1 (100.0)                 |                |
| 16                                                                         | 1 (100.0)                    | 0 (0.0)                   |                |
| 17                                                                         | 1 (100.0)                    | 0 (0.0)                   |                |
| 5-mFI, n (%)                                                               |                              |                           | <0.001         |
| 0                                                                          | 444 (98.7)                   | 6 (1.3)                   |                |
| 1                                                                          | 799 (94.2)                   | 49 (5.8)                  |                |

|                           |              |           |        |
|---------------------------|--------------|-----------|--------|
| 2                         | 636 (90.5)   | 67 (9.5)  |        |
| 3                         | 223 (82.0)   | 49 (18.0) |        |
| 4                         | 67 (81.7)    | 15 (18.3) |        |
| 5                         | 5 (50.0)     | 5 (50.0)  |        |
| ASA Classification, n (%) |              |           | <0.001 |
| 1                         | 170 (98.3)   | 3 (1.7)   |        |
| 2                         | 927 (95.5)   | 44 (4.5)  |        |
| 3                         | 944 (90.7)   | 97 (9.3)  |        |
| 4                         | 133 (73.9)   | 47 (26.1) |        |
| RCRI, n (%)               |              |           | <0.001 |
| 0                         | 1,117 (93.9) | 72 (6.1)  |        |
| 1                         | 675 (91.7)   | 61 (8.3)  |        |
| 2                         | 268 (86.2)   | 43 (13.8) |        |
| 3                         | 95 (88.0)    | 13 (12.0) |        |
| 4                         | 18 (90.0)    | 2 (10.0)  |        |
| 5                         | 1 (100.0)    | 0 (0.0)   |        |

P-values are calculated using a Chi-square test or Fisher's exact test.

*OFS, Orthopedic Hip Frailty Score; NHFS, Nottingham Hip Fracture Score; CCI, Charlson Comorbidity Index; 5-mFI, 5-factor modified Frailty Index; ASA, American Society of Anesthesiologists; RCRI, Revised Cardiac Risk Index*

**Supplemental Table 3.** Detailed description of the local dataset used for validation

|                                           | <b>Total<br/>(N = 2,365)</b> |
|-------------------------------------------|------------------------------|
| Age, median [IQR]                         | 84 [77-89]                   |
| Sex, n (%)                                |                              |
| Female                                    | 1,601 (67.7)                 |
| Male                                      | 764 (32.3)                   |
| ASA Classification, n (%)                 |                              |
| 1                                         | 173 (7.3)                    |
| 2                                         | 971 (41.1)                   |
| 3                                         | 1,041 (44.0)                 |
| 4                                         | 180 (7.6)                    |
| OFS, n (%)                                |                              |
| 0                                         | 618 (26.1)                   |
| 1                                         | 636 (26.9)                   |
| 2                                         | 547 (23.1)                   |
| 3                                         | 399 (16.9)                   |
| 4                                         | 144 (6.1)                    |
| 5                                         | 21 (0.9)                     |
| Age ≥85, n (%)                            | 1,104 (46.7)                 |
| Congestive heart failure, n (%)           | 418 (17.7)                   |
| History of malignancy, n (%)              | 556 (23.5)                   |
| Institutionalized, n (%)                  | 622 (26.3)                   |
| Non-independent functional status, n (%)  | 908 (38.4)                   |
| Type of fracture, n (%)                   |                              |
| Non-displaced cervical (garden 1-2)       | 308 (13.0)                   |
| Displaced cervical (garden 3-4)           | 841 (35.6)                   |
| Basicervical                              | 109 (4.6)                    |
| Pertrochanteric (two fragments)           | 570 (24.1)                   |
| Pertrochanteric (multiple fragments)      | 370 (15.6)                   |
| Subtrochanteric                           | 167 (7.1)                    |
| Type of surgery, n (%)                    |                              |
| Pins or screws                            | 475 (20.1)                   |
| Pins or screws with sideplate             | 868 (36.7)                   |
| Intramedullary nail                       | 378 (16.0)                   |
| Hemiarthroplasty                          | 476 (20.1)                   |
| Total hip replacement                     | 168 (7.1)                    |
| Previous myocardial infarction, n (%)     | 370 (15.6)                   |
| Peripheral vascular disease, n (%)        | 177 (7.5)                    |
| History of cerebrovascular disease, n (%) | 579 (24.5)                   |
| Dementia, n (%)                           | 562 (23.8)                   |
| COPD, n (%)                               | 213 (9.0)                    |
| Connective tissue disease, n (%)          | 37 (1.6)                     |
| Liver disease, n (%)                      | 30 (1.3)                     |
| Diabetes mellitus, n (%)                  | 364 (15.4)                   |
| Chronic kidney disease, n (%)             | 175 (7.4)                    |
| Local cancer, n (%)                       | 471 (19.9)                   |
| Metastatic cancer, n (%)                  | 68 (2.9)                     |
| Leukemia, n (%)                           | 16 (0.7)                     |

---

|                 |          |
|-----------------|----------|
| Lymphoma, n (%) | 13 (0.5) |
|-----------------|----------|

---

*ASA, American Society of Anesthesiologists; OFS, Orthopedic Hip Frailty Score; COPD, chronic obstructive pulmonary disease*

---
